# Supplementary material
Source: publisher site journal article supplement (https://www.dovepress.com/article/241062)
Supplement: Supplementary file 1 [file get_supplementary_file.php]

# Appendix S1: Patient Interview Guide

1. Can you please describe how your medications are given to you by the medication dispensing device (MDS)?
2. How do you feel about using the MDS to help you take your medications?
3. a. What expectations did you have prior to using the MDS?

b. Has the MDS meet your expectations so far?

1. How did you find the usability of the MDS?
2. Have you noticed any benefits with how you take your medication since you started using the MDS (e.g., medication management or daily routine)?
3. Have you noticed any challenges with the use of the MDS (e.g., medication management or daily routine)?
4. Are you aware of what to do if you have any technical difficulties? Can you describe the steps you would take?
5. Have you noticed any changes in your relationship and interaction with your primary physician since you started using the MDS?
6. If applicable, have you noticed any changes in your relationship and interaction with the home care staff since you started using the MDS?
7. If applicable, have you noticed any changes in your relationship and interaction with your caregiver since you started using the MDS?
8. On a scale of 1-10, how satisfied are you with the MDS? 1 being you are strongly dissatisfied with the device and 10 being you are very satisfied with it. Please explain your choice.
9. Do you think you have a need for the MDS?
10. On a scale of 1-10, how likely are you to recommend the MDS to another older adult to help him/her with taking medications? 1 being you would never recommend the technology and 10 being you will very strongly recommend it. Please explain your choice.
11. a. On a scale of 1-10 how satisfied are you with the pharmacy’s service received through the MDS? 1 being you are strongly dissatisfied with the pharmacy service and 10 being you are very satisfied with it. Please explain your choice.

b. Did you notice any change in the pharmacy services provided to you at your original pharmacy compared to this pharmacy? Please describe.

1. Is there anything else about your experience with the MDS you would like to share with me today?
